# Supplementary material for: Zein as an Effective Carrier for Hesperidin Delivery Systems with Improved Prebiotic Potential
Source: MDPI journal article supplement (doi:10.3390/molecules28135209), 2023-07-04
Supplement: s1 [file s1]

Article

# Zein as an Effective Carrier for Hesperidin Delivery Systems with Improved Prebiotic Potential

Szymon Sip <sup>1</sup>, Anna Sip <sup>2</sup>, Andrzej Miklaszewski <sup>3</sup>, Marcin Żarowski <sup>4</sup> and Judyta Cielecka-Piontek <sup>1,\*</sup>

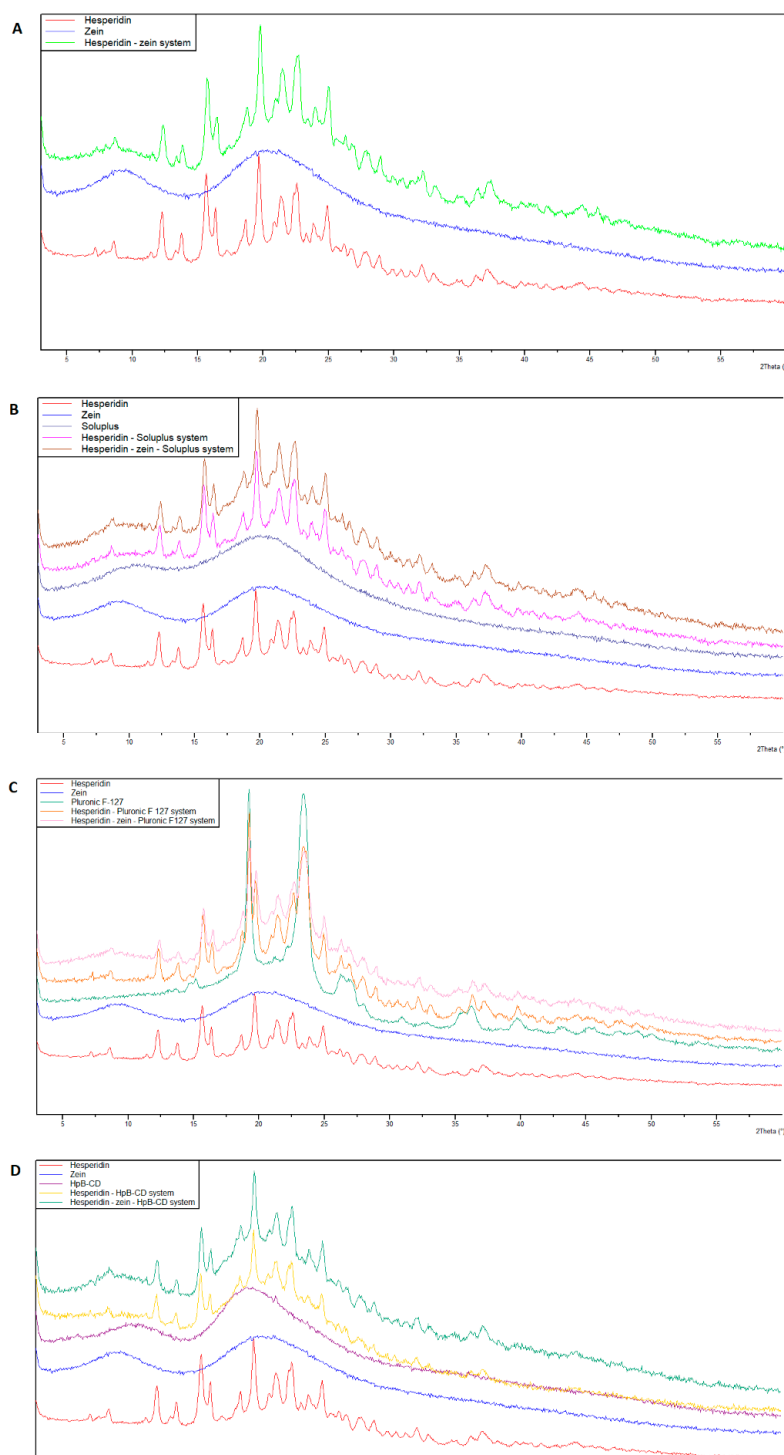

**Figure S1.** Diffractograms of the obtained systems: A - zein; B - Soluplus; C - Pluronic F-127; D - Hpβ-CD

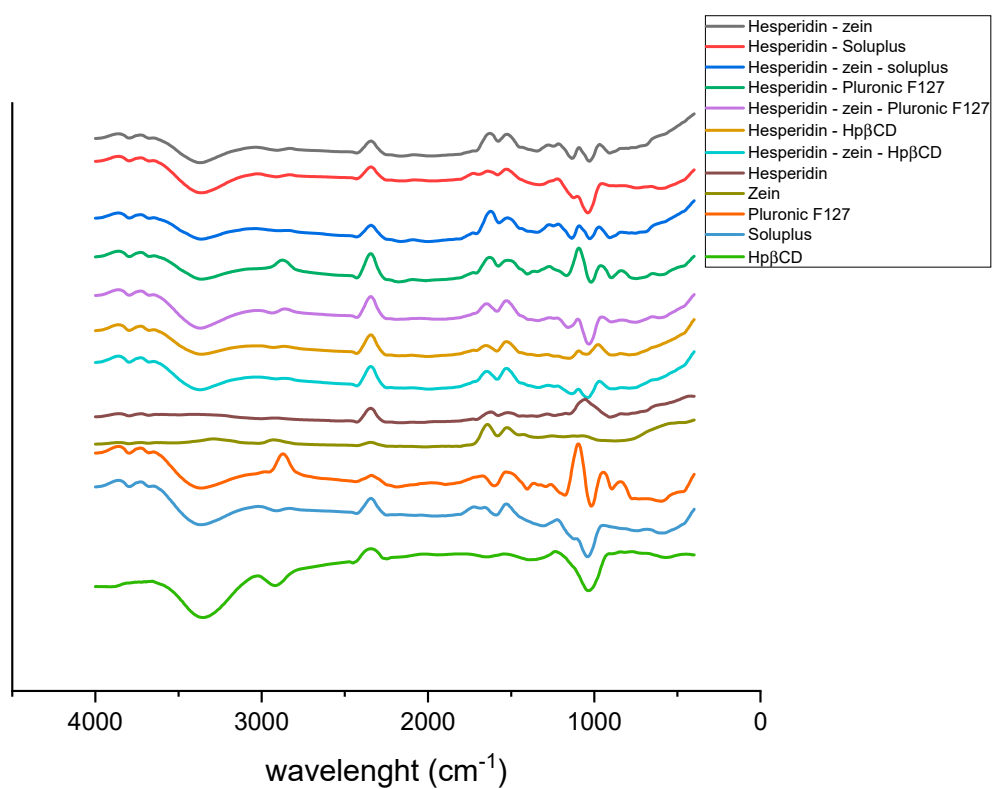

**Figure S2.** FT-IR spectrum for hesperidin, zein, Soluplus, Pluronic F127, Hpβ-CD, and the binary and triple systems were obtained.

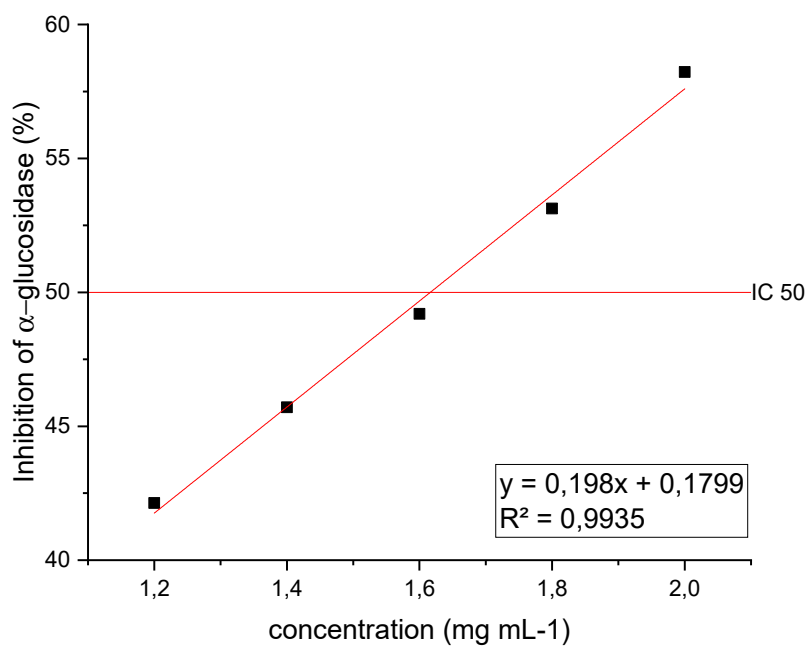

**Figure S3.** α-glucosidase inhibition profile with IC 50 parameter determined.

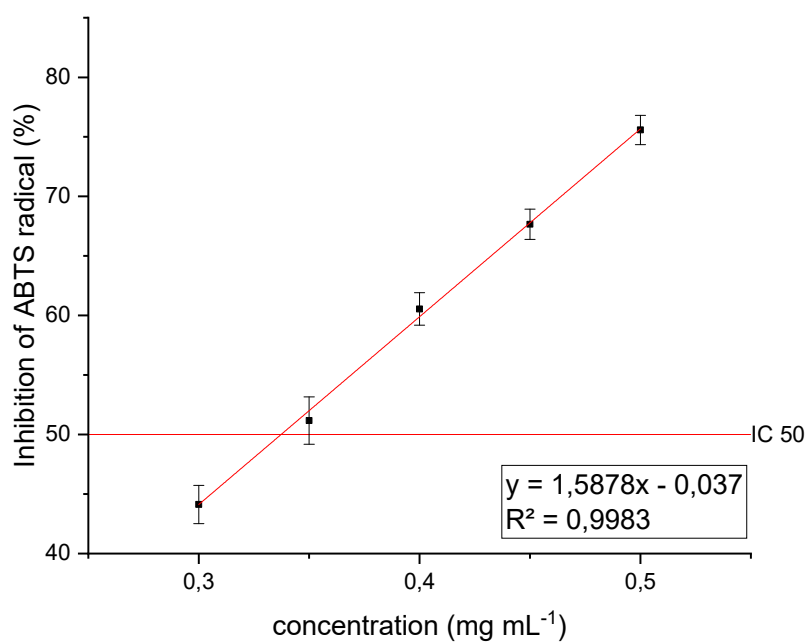

**Figure S4.** Profile of antioxidant activity in the ABTS model with the determined IC 50 parameter.

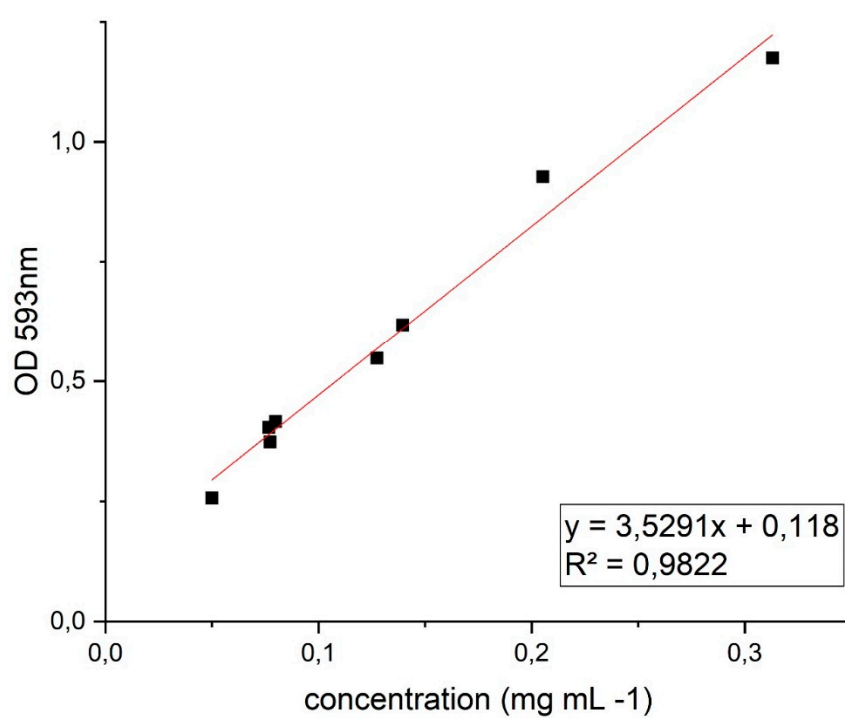

**Figure S5.** Antioxidant activity of hesperidin and obtained systems in FRAP assay.

**Table S1.** Log cycle values (CFU / ml) for screening cultures of selected bacterial strains

| Bacterial strain                  | Control  | Hesperidin | Hesperitin | Zein     | HpβCD    | Hesperidin - zein | Hesperidin - HpβCD | Hesperidin - zein - HpβCD |
|-----------------------------------|----------|------------|------------|----------|----------|-------------------|--------------------|---------------------------|
| <i>L. plantarum</i> KBiMŽ 5/72    | 9,216258 | 9,485588   | 9,447518   | 9,432682 | 9,338425 | 9,440717          | 9,50107            | 9,43499                   |
| <i>L. plantarum</i> KBiMŽ 6/2/1   | 9,34107  | 9,359338   | 9,369579   | 9,374648 | 9,272269 | 9,3884            | 9,403096           | 9,3371                    |
| <i>L. plantarum</i> 299v          | 7,646177 | 9,009332   | 9,046526   | 9,303226 | 9,246139 | 9,329097          | 9,406721           | 9,546334                  |
| <i>L. plantarum</i> W21           | 8,166667 | 9,072493   | 9,190158   | 9,046526 | 9,023615 | 8,943284          | 9,09459            | 9,025392                  |
| <i>L. rhamnosus</i> GG ATCC 53103 | 9,384676 | 9,504106   | 9,312852   | 9,417472 | 9,442994 | 9,458674          | 9,459777           | 9,403096                  |
| <i>L. paracasei</i> CNCM I-1572   | 8,528455 | 9,419837   | 9,398233   | 9,325066 | 9,2117   | 9,385921          | 9,389637           | 9,361911                  |

**Table S2.** Log cycle values (CFU / ml) for *Lactiplantibacillus Plantarum* 299v culture conducted for 96h.

| Time [H] | Control  | Hesperidin | Hesperitin | Zein     | HpβCD    | Hesperidin - zein | Hesperidin - HpβCD | Hesperidin - zein - HpβCD |
|----------|----------|------------|------------|----------|----------|-------------------|--------------------|---------------------------|
| 0        | 9,447518 | 9,532422   | 9,509122   | 9,467438 | 9,576186 | 9,585065          | 9,566693           | 9,561495                  |
| 24       | 9,395788 | 9,515067   | 9,496991   | 9,599293 | 9,603877 | 9,602358          | 9,602144           | 9,618574                  |
| 48       | 9,412716 | 9,602358   | 9,630656   | 9,621407 | 9,632381 | 9,634089          | 9,63635            | 9,651422                  |
| 72       | 9,465259 | 9,611337   | 9,617145   | 9,632381 | 9,57181  | 9,65381           | 9,606887           | 9,68533                   |
| 96       | 9,253469 | 9,447518   | 9,3371     | 9,549056 | 9,536975 | 9,543591          | 9,507122           | 9,593112                  |
